# Supplementary material for: Titanium thiosalicylate complexes: functional metalloligands for the construction of redox-active heterometallic architectures
Source: Royal Society of Chemistry journal article supplement (doi:10.1039/c8dt02641f), 2018-01-01
Supplement: c8dt02641f1.pdf [file c8dt02641f1.pdf]

## **Electronic Supplementary Information**

### **Titanium Thiosalicylate Complexes: Functional Metalloligands for the Construction of Redox-Active Heterometallic Architectures**

Rosa Fandos,\* Sonia Bruña, Carolina Hernández, Antonio Otero,\* Ana Rodríguez, María José Ruiz, Pilar Terreros and Isabel Cuadrado

**Crystal data for complexes 7·C<sub>4</sub>H<sub>8</sub>O:** Crystal of **7** was mounted in a glass capillary. Intensity data were collected at 180 K on a Bruker X8 APEX II CCD-based diffractometer, equipped with a graphite monochromated MoK $\alpha$  radiation source ( $\lambda = 0.71073 \text{ \AA}$ ). Data were integrated using SAINT<sup>[1]</sup> and an absorption correction was performed with the program SADABS.<sup>[2]</sup> The structures were solved by direct methods<sup>[3]</sup> and refined by full-matrix least-squares methods based on  $F^2$ .

All crystals that we could have obtained for compound **7** have been weakly diffracting samples (20% nearly) resulting of very low quality. The poor quality of these crystals prevents doing a detailed structural analysis but it allows confirm, unambiguously, the existence of one H<sub>2</sub>O molecule coordinated to Li atom. However, the structure is representative of the sample because several crystals were mounted with the same result. All molecules of THF are strongly disordered. Due to the low diffraction's intensity obtained in the experiment, it's very difficult to model the disorder and we have considered to stop only in the majority models assigning a chemical occupancy of 50% except for C25-C26 which have a value 60/40. This results in some high Uij for these molecules and they are refined isotropically. DELU, SIMU and SADI restraints have been used for these THF molecules. Hydrogen atoms were placed using a "riding model" and included in the refinement at calculated positions but It's no possible to locate the hydrogen atoms in the H<sub>2</sub>O molecule and they have been introduced with the CALC-OH (M. Nardelli, J. Appl. Cryst., 32, 563, 1999) program.

## References

1. SAINT+ v8.37, Bruker-AXS (2016), APEX3 v2016.1.0. Madison, Wisconsin, USA.
2. SADABS, L. Krause, R. Herbst-Irmer, G. M. Sheldrick and D. Stalke, *J. Appl. Crystallogr.*, 2015, **48**, 3-10.
3. (a) L. J. Farrugia, *J. Appl. Cryst.*, 2012, **45**, 849-854; (b) G. M. Sheldrick, SHELX-2014, Program for Crystal Structure Refinement, University of Göttingen, Göttingen, Germany, 2014.

**Table S1** Bond lengths [ $\text{\AA}$ ] and angles [ $^\circ$ ] for **7-C<sub>4</sub>H<sub>8</sub>O**.

|                                                 |                                                                                                |
|-------------------------------------------------|------------------------------------------------------------------------------------------------|
| Empirical formula                               | C <sub>64</sub> H <sub>80</sub> Li <sub>2</sub> O <sub>13</sub> S <sub>4</sub> Ti <sub>2</sub> |
| Formula weight                                  | 1295.20                                                                                        |
| Temperature (K)                                 | 180(2)                                                                                         |
| Wavelength ( $\text{\AA}$ )                     | 0.71073                                                                                        |
| Crystal system                                  | Orthorhombic                                                                                   |
| Space group                                     | P n m a                                                                                        |
| a( $\text{\AA}$ )                               | 22.77(2)                                                                                       |
| b( $\text{\AA}$ )                               | 21.68(2)                                                                                       |
| c( $\text{\AA}$ )                               | 14.279(16)                                                                                     |
| $\alpha$ ( $^\circ$ )                           | 90                                                                                             |
| $\beta$ ( $^\circ$ )                            | 90                                                                                             |
| $\gamma$ ( $^\circ$ )                           | 90                                                                                             |
| Volume( $\text{\AA}^3$ )                        | 7050(13)                                                                                       |
| Z                                               | 4                                                                                              |
| Density (calculated) (g/cm <sup>3</sup> )       | 1.220                                                                                          |
| Absorption coefficient (mm <sup>-1</sup> )      | 0.401                                                                                          |
| F(000)                                          | 2728                                                                                           |
| Crystal size (mm <sup>3</sup> )                 | 0.12 x 0.09 x 0.05                                                                             |
| Index ranges                                    | -28 $\leq$ h $\leq$ 27, -26 $\leq$ k $\leq$ 26, -17 $\leq$ l $\leq$ 17                         |
| Reflections collected                           | 46082                                                                                          |
| Independent reflections                         | 7239 [R(int) = 0.3141]                                                                         |
| Data / restraints / parameters                  | 7239 / 103 / 384                                                                               |
| Goodness-of-fit on F <sup>2</sup>               | 0.669                                                                                          |
| Final R indices [ $I > 2\sigma(I)$ ]            | R1 = 0.0819, wR2 = 0.1987                                                                      |
| Largest diff. peak / hole, e. $\text{\AA}^{-3}$ | 0.468 and -0.412                                                                               |

**Table S2** Selected bond lengths [ $\text{\AA}$ ] and angles [ $^\circ$ ] for **7-C<sub>4</sub>H<sub>8</sub>O**.

| <i>Bond Length</i> |          | <i>Angle</i>    |          |
|--------------------|----------|-----------------|----------|
| Ti(1)-O(1)         | 1.986(6) | O(1)-Ti(1)-O(3) | 83.1(2)  |
| Ti(1)-O(3)         | 2.016(5) | O(1)-Ti(1)-S(1) | 82.6(2)  |
| Ti(1)-S(1)         | 2.390(3) | O(3)-Ti(1)-S(2) | 82.6(2)  |
| Ti(1)-S(2)         | 2.414(3) | S(1)-Ti(1)-S(2) | 79.7(1)  |
| S(1)-C(6)          | 1.77(1)  | O(2)-Li(1)-O(5) | 114.1(7) |
| S(2)-C(8)          | 1.76(1)  | O(2)-Li(1)-O(6) | 103.1(8) |
| O(2)-Li(1)         | 1.87(1)  | O(4)-Li(2)-O(7) | 108.8(7) |
| O(5)-Li(1)         | 2.03(1)  | O(4)-Li(2)-O(8) | 107.9(7) |
| O(6)-Li(1)         | 1.90(2)  |                 |          |
| O(4)-Li(2)         | 1.78(1)  |                 |          |
| O(7)-Li(2)         | 1.97(2)  |                 |          |
| O(8)-Li(2)         | 2.02(2)  |                 |          |

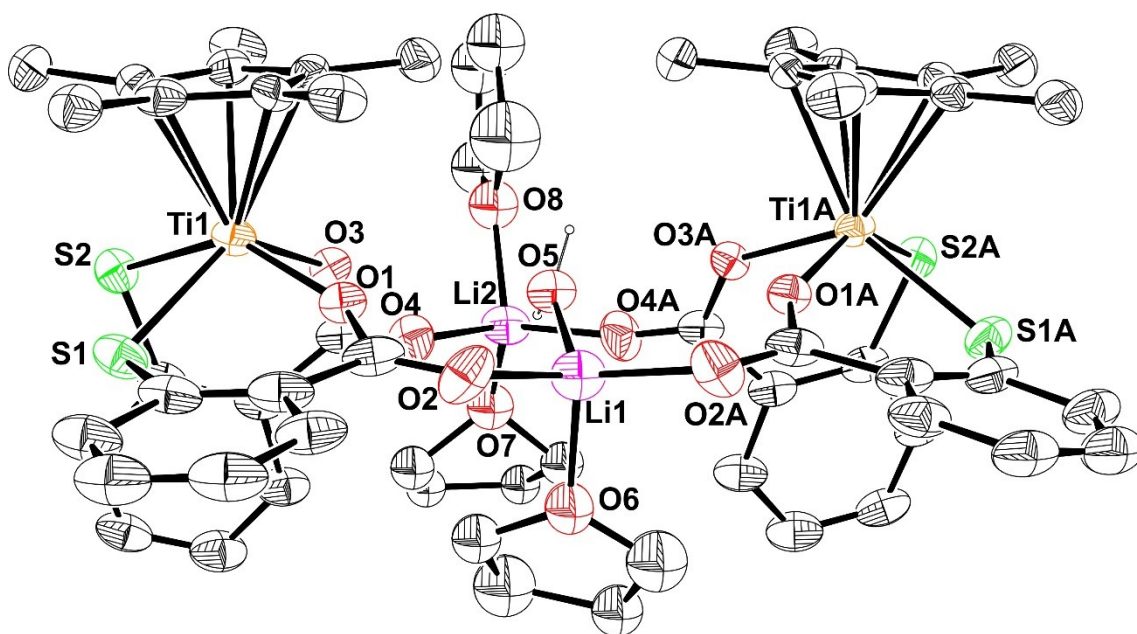

**Figure S1** ORTEP of compound **7-C<sub>4</sub>H<sub>8</sub>O**.

Symmetry transformations used to generate equivalent atoms, A:  $x, -y+3/2, z$
